# Supplementary material for: Imidazole-linked porphyrin-based conjugated microporous polymers for metal-free photocatalytic oxidative dehydrogenation of N-heterocycles
Source: Royal Society of Chemistry journal article supplement (doi:10.1039/d1se01410b), 2021-01-01
Supplement: d1se01410b1.pdf [file d1se01410b1.pdf]

## Supporting Information

# Imidazole-Linked Porphyrin-based Conjugated Microporous Polymers for Metal- Free Photocatalytic Oxidative dehydrogenation of N-Heterocycles

Yaju Chen<sup>a</sup> and Jun Jiang<sup>\*b</sup>

<sup>a</sup> School of Chemistry, Guangdong University of Petrochemical Technology,

Maoming 525000, P.R. China.

<sup>b</sup> Center for Industrial Analysis and Testing, Guangdong Academy of Sciences,

Guangzhou 510650, P.R. China. E-mail: [jiangjgas@163.com](mailto:jiangjgas@163.com)

## Materials and instruments

All chemicals and solvents were commercially available without further purification unless specified. Anatase TiO<sub>2</sub> was purchased from Energy Chemical Co. Ltd. BiVO<sub>4</sub>,<sup>1</sup> FeVO<sub>4</sub>,<sup>2</sup> CdS,<sup>3</sup> and g-C<sub>3</sub>N<sub>4</sub><sup>4</sup> were prepared according to the reported literature.

Solid-state <sup>13</sup>C CP/MAS NMR spectrum was obtained using a Bruker Avance III 400 MHz spectrometer. XPS spectra were conducted in a Thermo Fisher Scientific ESCALab250 using mono AlK $\alpha$  radiation ( $h\nu = 1486.6$  eV) as the excitation source under a base pressure of  $2 \times 10^{-9}$  mbar. The binding energies were referenced to the C 1s peak at 284.8 eV. The X-ray diffraction (XRD) patterns were recorded on a Rigaku Smartlab instrument using Cu K $\alpha$  radiation (40 kV) with a scan rate of 10°/min in the 2 $\theta$  range from 5° to 85°. The morphology was investigated using a Field Emission Scanning Electron Microscopy (Thermo Scientific Apreo 2C). N<sub>2</sub> sorption isotherm was recorded using an ASAP2020M adsorption instrument. Before measurement, the as-prepared sample was outgassed in vacuum at 100 °C for 10 h. UV-Vis DRS spectra were conducted in a Lambda 950 spectrophotometer in the wavelength range of 200-2000 nm. UPS spectra were performed with an unfiltered HeI (21.22 eV) gas discharge lamp. PL emission spectra were scanned on a FLS980 photoluminescence spectrometer with excitation at 420 nm. Photocatalysis was carried out on a CEL-LAB200E7 multichannel photochemical reaction system equipped with a circulating cooling water system and ten of white LED lamps (4.0 A, 40 mW/cm<sup>2</sup>), which was provided by Beijing China Education Au-light Co. Ltd. The spectrum of white LED was shown in Figure S1. Reaction products were analyzed by Agilent Agilent GC7890B equipped with DB-1 capillary column (0.25  $\mu$ m  $\times$  320  $\mu$ m  $\times$  30 m) and FID detector. Standard analysis condition: oven temperature 50 °C, injector temperature 300 °C, detector temperature 300 °C, heating rate 10 °C/min, final temperature 250 °C and hold time 1 min. ESR measurements were performed on a Bruker EMXplus ESR spectrometer.

## UV-Vis measurements

TCPP-TAB (10 mg) was dispersed in H<sub>2</sub>O containing NBT (0.4 mM). The mixture was irradiated under white LED and air atmosphere. UV-Vis spectra of the sample were recorded on a Shimadzu UV-1800 spectrophotometer in the wavelength range of 200-450 nm.

TCPP-TAB (10 mg) was dispersed in a DMA (5 mL) solution containing DPD (25 mg) and POD (1 mg). The mixture which was bubble with O<sub>2</sub> was irradiated under white LED for 5 min. After reaction, UV-Vis spectra of the sample were recorded on a Shimadzu UV-3600 spectrophotometer in the wavelength range of 400-600 nm.

### **ESR measurements**

TCPP-TAB (10 mg) was dispersed in DMA (5 mL) containing TEMP (100 μL). The mixture was irradiated under air atmosphere and white LED for 2 h. Next, the sample was analyzed on ESR spectrometer at microwave frequency of 9.85 GHz at room temperature. The blank experiment was conducted under same conditions in the absence of TCPP-TAB.

TCPP-TAB (10 mg) was dispersed in DMA (5 mL) containing DMPO (50 μL). The mixture was irradiated under air atmosphere and white LED for 2 h. Next, the sample was analyzed on ESR spectrometer at microwave frequency of 9.85 GHz at room temperature. The blank experiment was conducted under same conditions in the absence of TCPP-TAB.

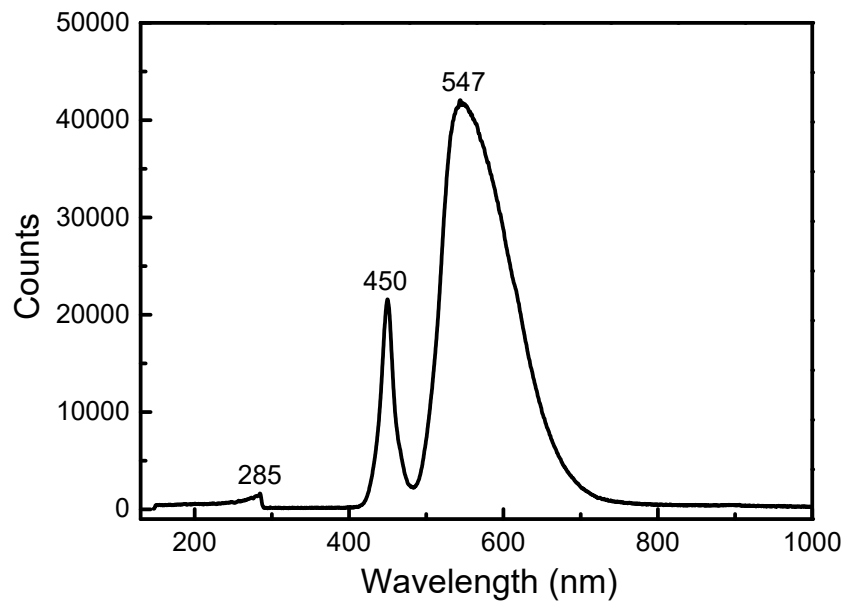

Figure S1. The spectrum of white LED

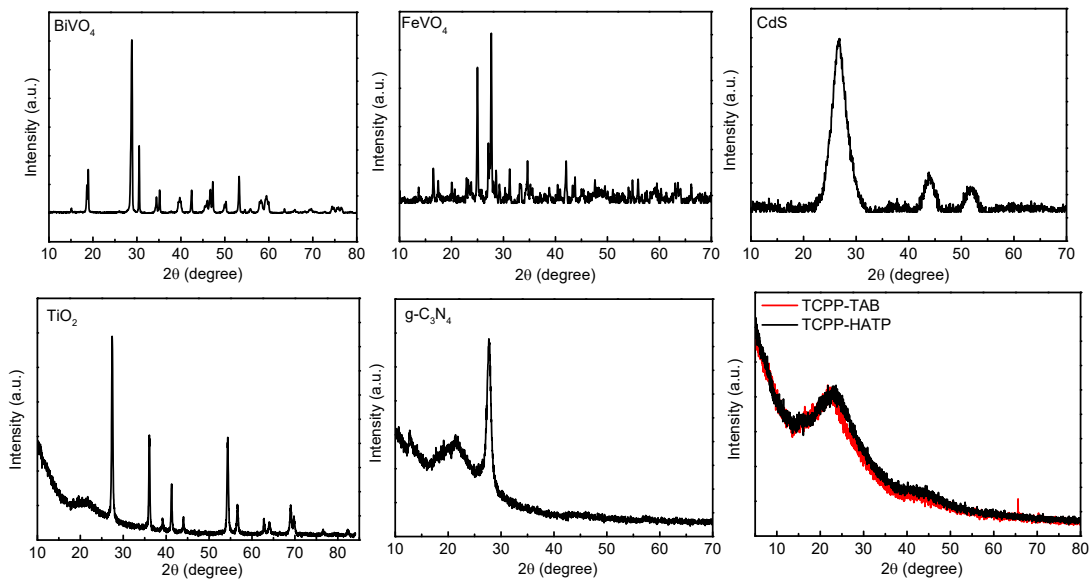

Figure S2. XRD patterns of BiVO<sub>4</sub>, FeVO<sub>4</sub>, CdS, TiO<sub>2</sub>, g-C<sub>3</sub>N<sub>4</sub>, TCPP-TAB and TCPP-HATP

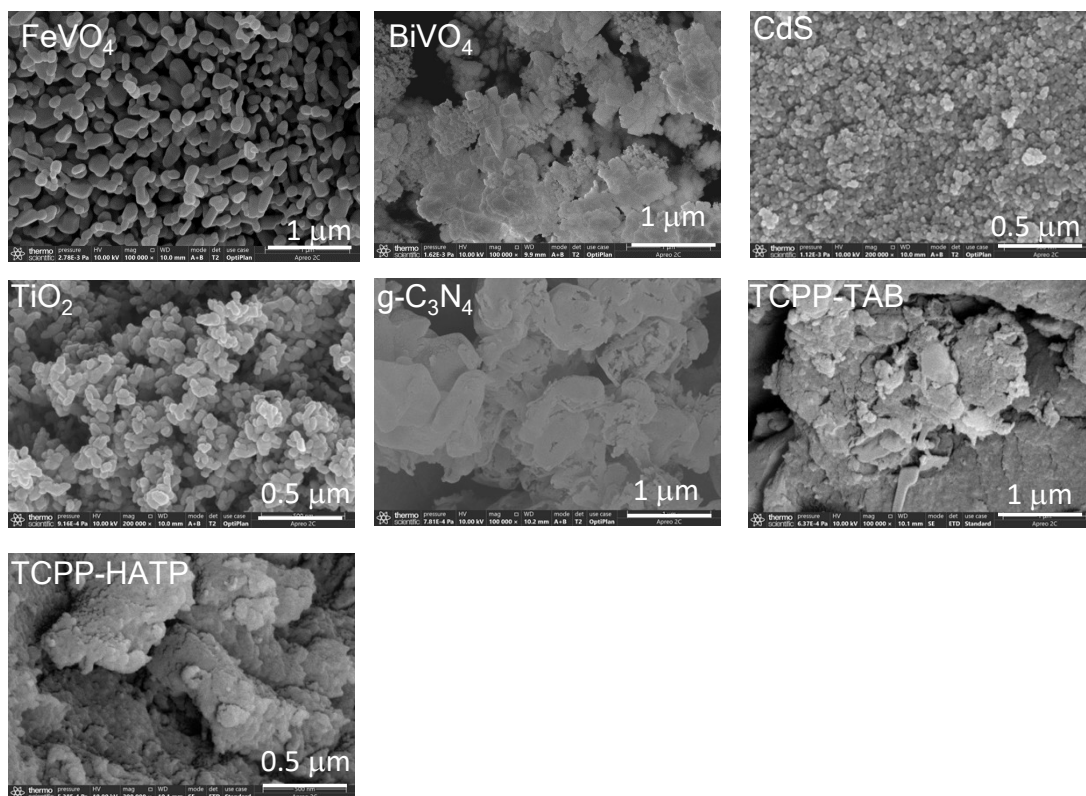

Figure S3. SEM images of BiVO<sub>4</sub>, FeVO<sub>4</sub>, CdS, TiO<sub>2</sub>, g-C<sub>3</sub>N<sub>4</sub>, TCPP-TAB and TCPP-HATP

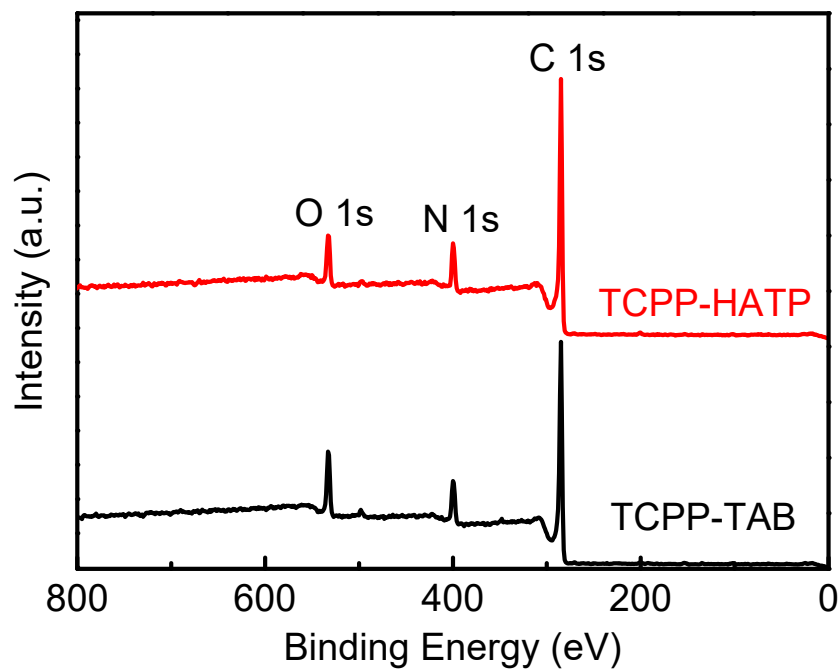

Figure S4. XPS spectra of TCPP-TAB and TCPP-HATP

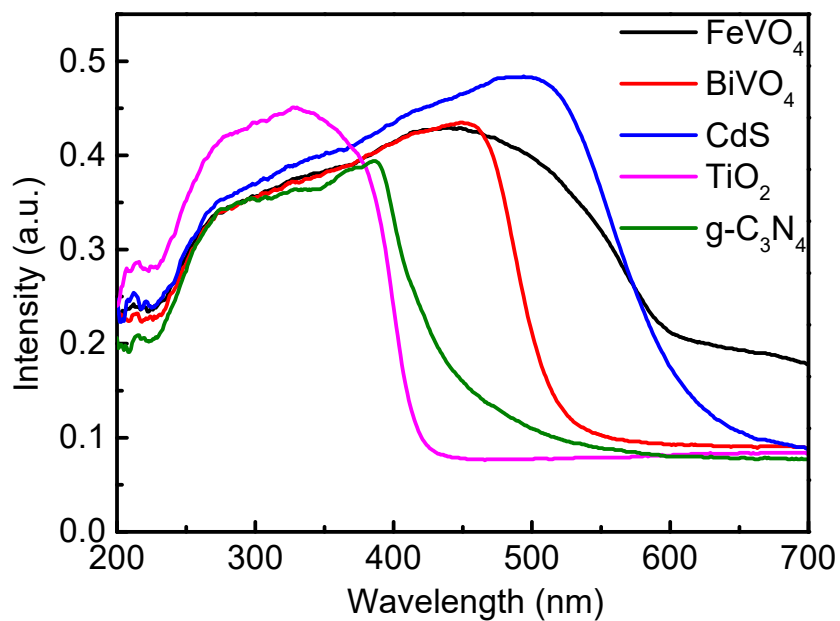

Figure S5. UV-Vis DRS spectra of BiVO<sub>4</sub>, FeVO<sub>4</sub>, CdS, TiO<sub>2</sub> and g-C<sub>3</sub>N<sub>4</sub>

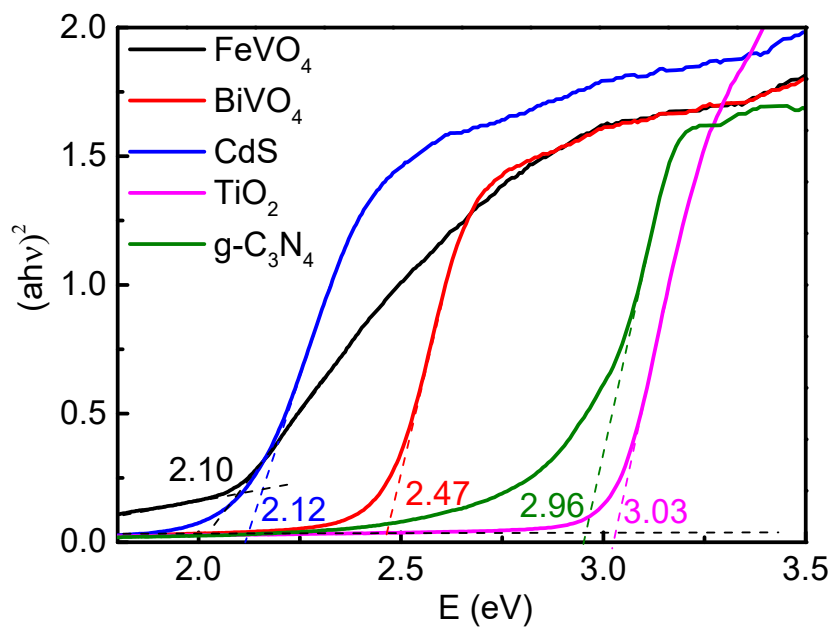

Figure S6. Band gap of BiVO<sub>4</sub>, FeVO<sub>4</sub>, CdS, TiO<sub>2</sub> and g-C<sub>3</sub>N<sub>4</sub>

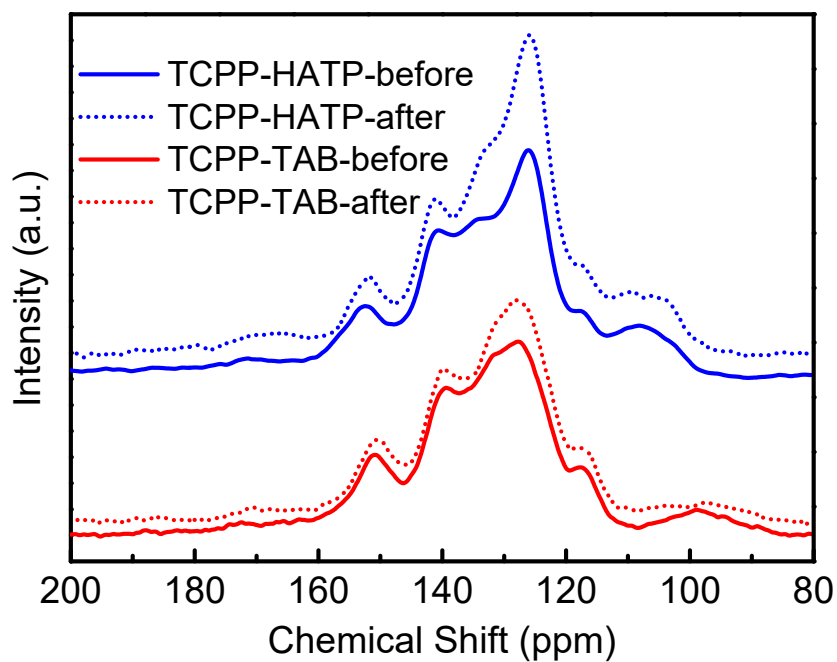

Figure S7. Solid state  $^{13}\text{C}$  CP/MAS NMR spectra of TCPP-TAB and TCPP-HATP before and after photocatalytic reaction

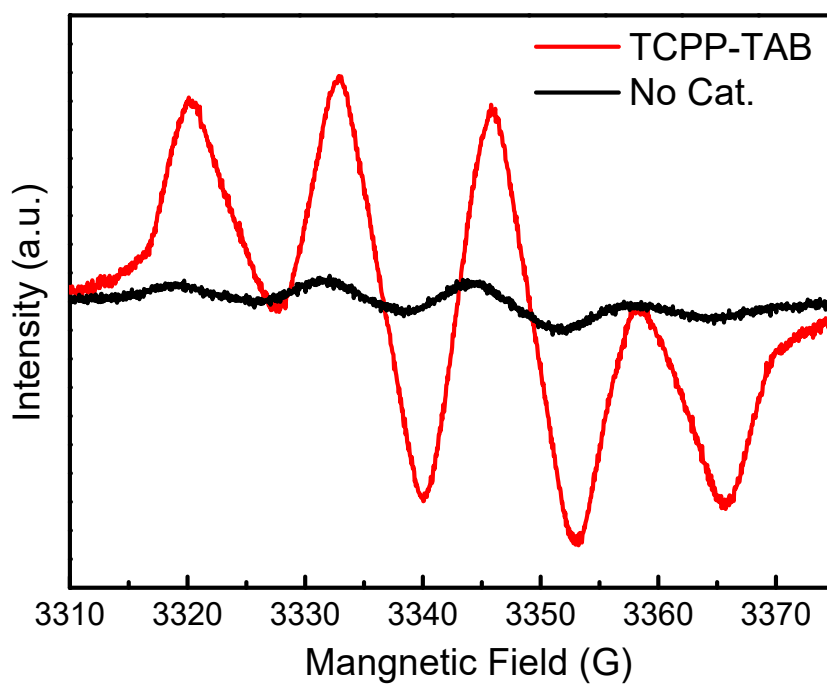

Figure S8. Determination of  $\text{O}_2^{\bullet-}$  using DMPO as the trapping agent by ESR spectrometer.

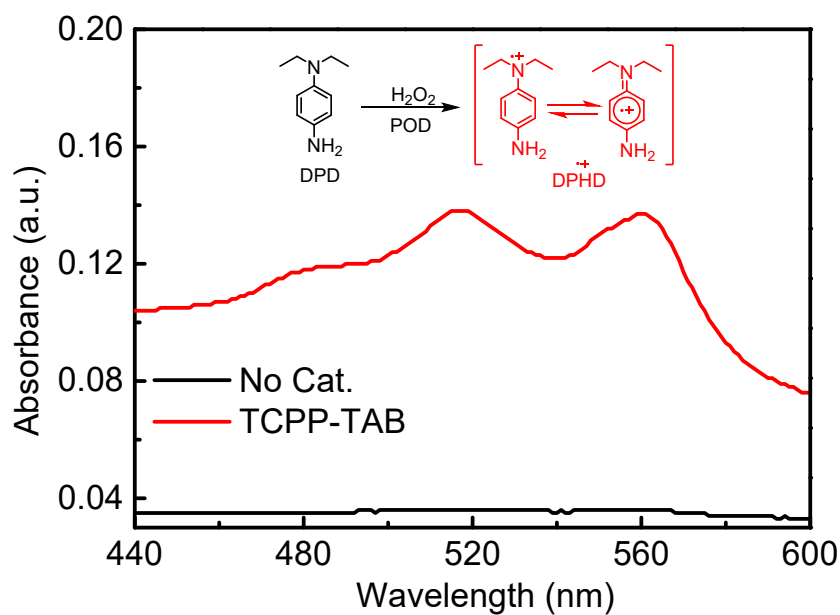

Figure S9. The ultraviolet-visible absorption spectra of reaction system with or without catalyst after adding DPD and POD

Table S1. Comparative experiments

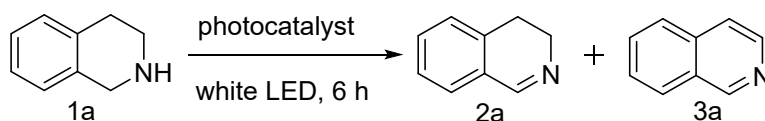

| Entry | Photocatalyst | O <sub>2</sub> | hν | Conv.(%) | Yield (%) <sup>c</sup> |      |
|-------|---------------|----------------|----|----------|------------------------|------|
|       |               |                |    |          | 2a                     | 3a   |
| 1     | –             | +              | +  | n.d.     | n.d.                   | n.d. |
| 2     | +             | –              | +  | n.d.     | n.d.                   | n.d. |
| 3     | +             | +              | –  | n.d.     | n.d.                   | n.d. |
| 4     | TCPP          | +              | +  | 99       | 74                     | 25   |

Reaction conditions: 1,2,3,4-tetrahydroisoquinoline (0.5 mmol), photocatalyst (10 mg), air atmosphere, white LED, dimethylacetamide (5 mL), room temperature and 6 h.



Table S2. VB and CB potentials of FeVO<sub>4</sub> and BiVO<sub>4</sub>

| Photocatalyst     | E <sub>g</sub> (eV) | E <sub>VB</sub> (V vs. NHE) | E <sub>CB</sub> (V vs. NHE) |
|-------------------|---------------------|-----------------------------|-----------------------------|
| FeVO <sub>4</sub> | 2.10                | 1.47                        | -0.63                       |
| BiVO <sub>4</sub> | 2.47                | 2.775                       | 0.305                       |

1. P. Chen, Y. Z. Li, C. X. Xiao, L. Chen, J. K. Guo, S. Shen, C. T. Au and S. F. Yin, *ACS Sustainable Chem. Eng.*, 2019, **7**, 17500-17506.
2. S. Samanta and R. Srivastava, *Appl. Catal. B: Environ.*, 2017, **218**, 621-636.
3. J. Jin, J. Yu, D. Guo, C. Cui and W. Ho, *Small*, 2015, **11**, 5262-5271.
4. J. W. Sun, J. Bian, J. D. Li, Z. Q. Zhang, Z. J. Li, Y. Qu, L. L. Bai, Z. D. Yang and L. Q. Jing, *Appl. Catal. B: Environ.*, 2020, **277**.
